# Supplementary material
Source: publisher figshare collection journal article supplement (https://sage.figshare.com/ndownloader/files/20420658)
Supplement: Supplementary file 1 [file 20420658]

Name: \_\_\_\_\_

Age: \_\_\_\_\_

Date of Birth: \_\_\_\_/\_\_\_\_/\_\_\_\_

**Screening Questions for Birth Control****General Information:**

|   |                                                                                                                                                                                                                                                                                                                                                                                                                                                                                                            |                                                          |
|---|------------------------------------------------------------------------------------------------------------------------------------------------------------------------------------------------------------------------------------------------------------------------------------------------------------------------------------------------------------------------------------------------------------------------------------------------------------------------------------------------------------|----------------------------------------------------------|
| 1 | What was the first day of your last menstrual period?                                                                                                                                                                                                                                                                                                                                                                                                                                                      | ____/____/____                                           |
| 2 | Do you think you might be pregnant now?                                                                                                                                                                                                                                                                                                                                                                                                                                                                    | Yes <input type="checkbox"/> No <input type="checkbox"/> |
| 3 | Have you ever used the following medications? Please check all that apply:<br><input type="checkbox"/> Birth control pills <input type="checkbox"/> Birth control shot <input type="checkbox"/> Condoms<br><input type="checkbox"/> Birth control patch <input type="checkbox"/> Birth control ring <input type="checkbox"/> Emergency contraception /Plan B<br><input type="checkbox"/> Birth control implant/rod <input type="checkbox"/> Intrauterine device (IUD) <input type="checkbox"/> Other _____ | Yes <input type="checkbox"/> No <input type="checkbox"/> |
| a | Did you ever experience a bad reaction (side effect) to using hormonal birth control? If yes, please list what kind of reaction occurred:                                                                                                                                                                                                                                                                                                                                                                  | Yes <input type="checkbox"/> No <input type="checkbox"/> |
| b | Are you currently using any method of birth control including pills, patch, ring, or shot/injection? If yes, please list which method you use: _____                                                                                                                                                                                                                                                                                                                                                       | Yes <input type="checkbox"/> No <input type="checkbox"/> |
| 4 | Have you ever been told by a medical professional not to take birth control or other hormones?                                                                                                                                                                                                                                                                                                                                                                                                             | Yes <input type="checkbox"/> No <input type="checkbox"/> |

**Medical History:**

|    |                                                                                                                                                                                                                                                                                                                                                                                                                                                                                                                                                                                              |                                                          |
|----|----------------------------------------------------------------------------------------------------------------------------------------------------------------------------------------------------------------------------------------------------------------------------------------------------------------------------------------------------------------------------------------------------------------------------------------------------------------------------------------------------------------------------------------------------------------------------------------------|----------------------------------------------------------|
| 5  | Have you given birth within the past 6 weeks?                                                                                                                                                                                                                                                                                                                                                                                                                                                                                                                                                | Yes <input type="checkbox"/> No <input type="checkbox"/> |
| 6  | Are you currently breastfeeding?                                                                                                                                                                                                                                                                                                                                                                                                                                                                                                                                                             | Yes <input type="checkbox"/> No <input type="checkbox"/> |
| 7  | Do you have diabetes?                                                                                                                                                                                                                                                                                                                                                                                                                                                                                                                                                                        | Yes <input type="checkbox"/> No <input type="checkbox"/> |
| 8  | Do you get migraine headaches?                                                                                                                                                                                                                                                                                                                                                                                                                                                                                                                                                               | Yes <input type="checkbox"/> No <input type="checkbox"/> |
| a  | If so, have you ever had the kind of headaches that start with warning signs (aura) or symptoms such as flashes of light, blind spots, or tingling in your hands or face that come before the headache starts?                                                                                                                                                                                                                                                                                                                                                                               | Yes <input type="checkbox"/> No <input type="checkbox"/> |
| 9  | Do you have high blood pressure, hypertension, or high cholesterol? (Please check yes, even if it is controlled by medication)                                                                                                                                                                                                                                                                                                                                                                                                                                                               | Yes <input type="checkbox"/> No <input type="checkbox"/> |
| 10 | Have you ever had a heart attack or stroke, or been told you had any heart disease?                                                                                                                                                                                                                                                                                                                                                                                                                                                                                                          | Yes <input type="checkbox"/> No <input type="checkbox"/> |
| 11 | Have you ever had a blood clot (for example, a deep vein thrombosis or pulmonary embolism)?                                                                                                                                                                                                                                                                                                                                                                                                                                                                                                  | Yes <input type="checkbox"/> No <input type="checkbox"/> |
| 12 | Have you ever been told by a medical professional that you are at higher risk of developing a blood clot? Examples might include antiphospholipid antibody syndrome, Factor V Leiden, or a prothrombin mutation.                                                                                                                                                                                                                                                                                                                                                                             | Yes <input type="checkbox"/> No <input type="checkbox"/> |
| 13 | Have you had recent major surgery or are you planning to have surgery in the next 4 weeks?<br>If yes, please explain:<br>Type of Surgery: _____ Date of Surgery: ____/____/____                                                                                                                                                                                                                                                                                                                                                                                                              | Yes <input type="checkbox"/> No <input type="checkbox"/> |
| 14 | Have you had bariatric surgery (weight loss) or stomach reduction surgery?                                                                                                                                                                                                                                                                                                                                                                                                                                                                                                                   | Yes <input type="checkbox"/> No <input type="checkbox"/> |
| 15 | Do you have any of the following conditions? Please check below:<br><input type="checkbox"/> Breast Cancer <input type="checkbox"/> Gall bladder disease <input type="checkbox"/> Multiple Sclerosis<br><input type="checkbox"/> Lupus <input type="checkbox"/> Blood disorders <input type="checkbox"/> Cystic Fibrosis<br><input type="checkbox"/> Rheumatoid arthritis <input type="checkbox"/> Solid Organ Transplant<br><input type="checkbox"/> Inflammatory Bowel Disease (IBD)<br><input type="checkbox"/> Hepatitis, liver disease, liver cancer, or jaundice (yellow skin or eyes) | Yes <input type="checkbox"/> No <input type="checkbox"/> |
| a  | Do you have any other medical problems?<br>- If yes, list medical problems here: _____                                                                                                                                                                                                                                                                                                                                                                                                                                                                                                       | Yes <input type="checkbox"/> No <input type="checkbox"/> |
| 16 | Do you take medication for seizures, tuberculosis (TB), fungal infections, or human immunodeficiency virus (HIV)? If yes, list them here:                                                                                                                                                                                                                                                                                                                                                                                                                                                    | Yes <input type="checkbox"/> No <input type="checkbox"/> |
| 17 | Do you take any medications, including herbs or supplements?<br>- If yes, list medications here: _____                                                                                                                                                                                                                                                                                                                                                                                                                                                                                       | Yes <input type="checkbox"/> No <input type="checkbox"/> |
| 18 | Do you have allergies or bad reaction to medication? If yes, please explain here:                                                                                                                                                                                                                                                                                                                                                                                                                                                                                                            | Yes <input type="checkbox"/> No <input type="checkbox"/> |
| 19 | Do you weigh over 200lbs?                                                                                                                                                                                                                                                                                                                                                                                                                                                                                                                                                                    | Yes <input type="checkbox"/> No <input type="checkbox"/> |
| 20 | Do you smoke cigarettes, use chewing tobacco, e-cigarettes, or other nicotine products?                                                                                                                                                                                                                                                                                                                                                                                                                                                                                                      | Yes <input type="checkbox"/> No <input type="checkbox"/> |

For the Pharmacist: If a patient has a potential contraindication or answers "Yes" to any of the Medical History questions, please consult the MEC.

| Self-Screening Question | Condition                            | Sub-Condition                                                 | Combined Pill/Patch/Ring           |          | Progestin-Only Methods: Pill (POP)/Shot                       |          | Long-Acting Methods: Copper (IUD) / Hormone (IUD and Implant) |          |
|-------------------------|--------------------------------------|---------------------------------------------------------------|------------------------------------|----------|---------------------------------------------------------------|----------|---------------------------------------------------------------|----------|
|                         |                                      |                                                               | Initiate                           | Continue | Initiate                                                      | Continue | Initiate                                                      | Continue |
|                         | Age                                  |                                                               | Menarche to <40yrs: 1<br>≥40yrs: 2 |          | POP: 1 (All Ages)                                             |          | IUD: 2 (Menarche-<20yrs)<br>IUD: 1 (≥20yrs)                   |          |
|                         |                                      |                                                               |                                    |          | shot: 2 (Menarche to <18yrs and >45yrs)<br>shot: 1 (18-45yrs) |          | implant: 1 (All Ages)                                         |          |
| 1                       | Pregnancy                            |                                                               | Not Eligible for Contraception     |          |                                                               |          |                                                               |          |
| 5                       | Post-Partum (see also breastfeeding) | a) < 21 days                                                  | 4                                  |          | 1                                                             |          | Consult MEC*(IUD)<br>1 (implant)                              |          |
|                         |                                      | b) 21 days to 42 days:                                        |                                    |          |                                                               |          |                                                               |          |
|                         |                                      | (i) with other risk factors for VTE                           | 3*                                 |          | 1                                                             |          | Consult MEC* (IUD)<br>1 (implant)                             |          |
|                         |                                      | (ii) without other risk factors for VTE                       | 2                                  |          | 1                                                             |          | Consult MEC* (IUD)<br>1 (implant)                             |          |
|                         |                                      | c) > 42 days                                                  | 1                                  |          | 1                                                             |          | 1* (IUD)<br>1 (implant)                                       |          |
| 6                       | Breastfeeding (see also post-partum) | a) < 30 days postpartum                                       | 3*/4*                              |          | 2*                                                            |          | Consult MEC* (IUD)<br>2* (implant)                            |          |
|                         |                                      | b) 30 days to 42 days postpartum                              |                                    |          |                                                               |          |                                                               |          |
|                         |                                      | (i) with other risk factors for VTE                           | 3*                                 |          | 1*                                                            |          | Consult MEC* (IUD)<br>1* (implant)                            |          |
|                         |                                      | (ii) without other risk factors for VTE                       | 2*                                 |          | 1*                                                            |          | Consult MEC* (IUD)<br>1* (implant)                            |          |
|                         |                                      | c)> 42 days postpartum                                        | 2*                                 |          | 1*                                                            |          | 1*                                                            |          |
| 7                       | Diabetes                             | a) History of gestational DM only                             | 1                                  |          | 1                                                             |          | 1                                                             |          |
|                         |                                      | b) Non-vascular disease                                       |                                    |          |                                                               |          |                                                               |          |
|                         |                                      | (i) non-insulin dependent                                     | 2                                  |          | 2                                                             |          | 1 (copper)<br>2 (hormone)                                     |          |
|                         |                                      | (ii) insulin dependent                                        | 2                                  |          | 2                                                             |          | 1 (copper)<br>2 (hormone)                                     |          |
|                         |                                      | c) Nephropathy/retinopathy/neuropathy‡                        | 3/4*                               |          | 2 (POP)<br>3 (shot)                                           |          | 1 (copper)<br>2 (hormone)                                     |          |
|                         |                                      | d) Other vascular disease or diabetes of >20 years' duration‡ | 3/4*                               |          | 2 (POP)<br>3 (shot)                                           |          | 1 (copper)<br>2 (hormone)                                     |          |
|                         |                                      |                                                               |                                    |          |                                                               |          |                                                               |          |
| 8                       | Headaches                            | a) Non-migrainous                                             | 1*                                 |          | 1                                                             |          | 1                                                             |          |
|                         |                                      | b) Migraine:                                                  |                                    |          |                                                               |          |                                                               |          |
|                         |                                      | i) without aura                                               | 2*                                 |          | 1                                                             |          | 1                                                             |          |
|                         |                                      | ii) with aura                                                 | 4*                                 |          | 1                                                             |          | 1                                                             |          |
| 9                       | High Blood Pressure                  | a) Adequately controlled hypertension                         | 3*                                 |          | 1* (POP)<br>2* (shot)                                         |          | 1*                                                            |          |
|                         |                                      | b) Elevated BP (properly taken measurements):                 |                                    |          |                                                               |          |                                                               |          |
|                         |                                      | (i) systolic 140-159 or diastolic 90-99                       | 3*                                 |          | 1* (POP)<br>2*(shot)                                          |          | 1*                                                            |          |
|                         |                                      | (ii) systolic ≥160 or diastolic ≥100‡                         | 4*                                 |          | 2*(POP)<br>3* (shot)                                          |          | 1* (copper)<br>2*(hormone)                                    |          |
|                         |                                      | c) Vascular disease                                           | 4*                                 |          | 2*(POP)<br>3* (shot)                                          |          | 1* (copper)<br>2*(hormone)                                    |          |
|                         |                                      |                                                               |                                    |          |                                                               |          |                                                               |          |
|                         |                                      |                                                               |                                    |          |                                                               |          |                                                               |          |
|                         |                                      | History of High BP during Pregnancy                           |                                    | 2        |                                                               | 1        |                                                               | 1        |
| 10<br>(continues)       | Peripartum Cardiomyopathy            | a) Normal or mildly impaired cardiac function:                |                                    |          |                                                               |          |                                                               |          |
|                         |                                      | (i) < 6 months                                                | 4                                  |          | 1                                                             |          | 2 (IUD)<br>1 (implant)                                        |          |

| Self-Screening Question                 | Condition                                                         | Sub-Condition                                                           | Combined Pill/Patch/Ring |           | Progestin-Only Methods: Pill (POP)/Shot |                               | Long-Acting Methods: Copper (IUD) / Hormone (IUD and Implant) |          |
|-----------------------------------------|-------------------------------------------------------------------|-------------------------------------------------------------------------|--------------------------|-----------|-----------------------------------------|-------------------------------|---------------------------------------------------------------|----------|
|                                         |                                                                   |                                                                         | Initiate                 | Continue  | Initiate                                | Continue                      | Initiate                                                      | Continue |
| 10<br>(continued)                       |                                                                   | (ii) ≥ 6 months                                                         | 3                        |           | 1                                       |                               | 2 (IUD)<br>1(implant)                                         |          |
|                                         |                                                                   | b) Moderately or severely impaired cardiac function                     | 4                        |           | 2                                       |                               | 2                                                             |          |
|                                         | Multiple Risk factors for arterial CVD                            | (such as older age, smoking, diabetes, hyperlipidemia and hypertension) | 3/4*                     | 2* (POP)  |                                         | 1 (copper)<br>2 (hormone)     |                                                               |          |
|                                         |                                                                   |                                                                         |                          | 3* (shot) |                                         | 2* (implant)                  |                                                               |          |
|                                         | Ischemic heart disease                                            | Current and history of                                                  | 4                        | 2 (POP)   | 3 (POP)                                 | 1 (copper)                    |                                                               |          |
|                                         |                                                                   |                                                                         |                          | 3 (shot)  |                                         | 2 (hormone)                   | 3 (hormone)                                                   |          |
| 10<br>(continued)                       | Valvular Heart disease                                            | a) Uncomplicated                                                        | 2                        |           | 1                                       |                               | 1                                                             |          |
|                                         |                                                                   | b) Complicated‡                                                         | 4                        |           | 1                                       |                               | 1                                                             |          |
|                                         | Stroke‡                                                           | History of cerebrovascular accident                                     | 4                        | 2 (POP)   | 3 (POP)                                 | 1 (copper)<br>2 (hormone IUD) |                                                               |          |
|                                         |                                                                   |                                                                         |                          | 3 (shot)  |                                         | 2 (implant)                   | 3 (implant)                                                   |          |
| 11 & 12                                 | Thrombogenic Mutations                                            |                                                                         | 4*                       |           | 2*                                      |                               | 1* (copper)<br>2* (hormone)                                   |          |
|                                         | Blood Clot-Deep Venous Thrombosis (DVT) & Pulmonary Embolism (PE) | a) History of DVT/PE, not on anticoagulation therapy                    |                          |           |                                         |                               |                                                               |          |
|                                         |                                                                   | i) higher risk for recurrent DVT/PE                                     | 4                        | 2         |                                         | 1 (copper)<br>2 (hormone)     |                                                               |          |
|                                         |                                                                   | ii) lower risk for recurrent DVT/PE                                     | 3                        | 2         |                                         | 1 (copper)<br>2 (hormone)     |                                                               |          |
|                                         |                                                                   | b) Acute DVT/PE                                                         | 4                        | 2         |                                         | 2                             |                                                               |          |
|                                         |                                                                   | c) DVT/PE and established on anticoagulant therapy for at least 3mos    |                          |           |                                         |                               |                                                               |          |
|                                         |                                                                   | i) higher risk for recurrent DVT/PE                                     | 4*                       | 2         |                                         | 2                             |                                                               |          |
|                                         |                                                                   | ii) lower risk for recurrent DVT/PE                                     | 3*                       | 2         |                                         | 2                             |                                                               |          |
|                                         |                                                                   | d) Family history (first-degree relatives)                              | 2                        | 1         |                                         | 1                             |                                                               |          |
|                                         | 13                                                                | Surgery                                                                 | a) Major surgery         |           |                                         |                               |                                                               |          |
| (i) with prolonged immobilization       |                                                                   |                                                                         | 4                        | 2         |                                         | 1 (copper)<br>2 (hormone)     |                                                               |          |
| (ii) without prolonged immobilization   |                                                                   |                                                                         | 2                        | 1         |                                         | 1                             |                                                               |          |
| b) Minor surgery without immobilization |                                                                   |                                                                         | 1                        | 1         |                                         | 1                             |                                                               |          |
| 14                                      | Bariatric Surgery                                                 | a) Restrictive procedures                                               | 1                        |           | 1                                       |                               | 1                                                             |          |
|                                         |                                                                   | b) Malabsorptive procedures                                             | 3 (COC)                  |           | 3 (POP)                                 |                               | 1                                                             |          |
|                                         |                                                                   |                                                                         | 1 (patch/ring)           |           | 1 (shot)                                |                               |                                                               |          |
| 15<br>(continues)                       | Breast Cancer                                                     | a) Undiagnosed mass                                                     | 2*                       |           | 2*                                      |                               | 1 (copper)<br>2 (hormone)<br>2* (implant)                     |          |
|                                         |                                                                   | b) Benign breast disease                                                | 1                        |           | 1                                       |                               | 1                                                             |          |
|                                         |                                                                   | c) Family history of cancer                                             | 1                        |           | 1                                       |                               | 1                                                             |          |
|                                         |                                                                   | d) Breast cancer‡                                                       |                          |           |                                         |                               |                                                               |          |
|                                         |                                                                   | i) current                                                              | 4                        |           | 4                                       |                               | 1 (copper)<br>4 (hormone)                                     |          |
|                                         |                                                                   | ii) past and no evidence of current disease for 5 years                 | 3                        |           | 3                                       |                               | 1 (copper)<br>3 (hormone)                                     |          |
|                                         | Lupus‡                                                            | a) Positive/unknown antiphospholipid antibodies                         | 4*                       |           | 3*                                      |                               | 1* (copper)<br>3* (hormone)                                   |          |

| Self-Screening Question | Condition                                  | Sub-Condition                       | Combined Pill/Patch/Ring |          | Progestin-Only Methods: Pill (POP)/Shot |           | Long-Acting Methods: Copper (IUD) / Hormone (IUD and Implant) |             |
|-------------------------|--------------------------------------------|-------------------------------------|--------------------------|----------|-----------------------------------------|-----------|---------------------------------------------------------------|-------------|
|                         |                                            |                                     | Initiate                 | Continue | Initiate                                | Continue  | Initiate                                                      | Continue    |
| 15<br>(continued)       |                                            | b) Severe thrombocytopenia          | 2*                       |          | 2* (POP)                                |           | 3* (copper)                                                   | 2* (copper) |
|                         |                                            |                                     |                          |          | 3* (shot)                               | 2* (shot) | 2* (hormone)                                                  |             |
|                         |                                            | c) Immunosuppressive treatment      | 2*                       |          | 2*                                      |           | 2* (copper)                                                   | 1* (copper) |
|                         |                                            |                                     |                          |          |                                         |           | 2* (hormone)                                                  |             |
|                         |                                            | d) None of the above                | 2*                       |          | 2*                                      |           | 1*(copper)                                                    |             |
|                         |                                            |                                     |                          |          |                                         |           | 2* (hormone)                                                  |             |
|                         | Rheumatoid Arthritis                       | a) On immunosuppressive therapy     | 2                        |          | 1 (POP)                                 |           | 2 (IUD)                                                       | 1 (IUD)     |
|                         |                                            |                                     |                          |          | 2/3* (shot)                             |           | 1 (implant)                                                   |             |
|                         |                                            | b) Not on immunosuppressive therapy | 2                        |          | 1 (POP)                                 |           | 1                                                             |             |
|                         | Inflammatory Bowel Disease                 |                                     |                          |          | 2 (shot)                                |           |                                                               |             |
|                         |                                            | Ulcerative Colitis, Crohn's Disease | 2/3*                     |          | 2                                       |           | 1                                                             |             |
| 15<br>(continued)       | Viral Hepatitis                            | a) Acute or flare                   | 3/4*                     | 2        | 1                                       |           | 1                                                             |             |
|                         |                                            | b) Carrier/Chronic                  | 1                        |          | 1                                       |           | 1                                                             |             |
|                         | Cirrhosis                                  | a) Mild (compensated)               | 1                        |          | 1                                       |           | 1                                                             |             |
|                         |                                            | b) Severe‡ (decompensated)          | 4                        |          | 3                                       |           | 1 (copper)                                                    |             |
|                         | Liver Tumors                               |                                     |                          |          |                                         |           | 3 (hormone)                                                   |             |
|                         |                                            | a) Benign:                          |                          |          |                                         |           |                                                               |             |
|                         |                                            | i) Focal nodular hyperplasia        | 2                        |          | 2                                       |           | 1 (copper)                                                    |             |
|                         |                                            |                                     |                          |          |                                         |           | 2 (hormone)                                                   |             |
|                         |                                            | ii) Hepatocellular adenoma‡         | 4                        |          | 3                                       |           | 1 (copper)                                                    |             |
|                         |                                            |                                     |                          |          |                                         |           | 3 (hormone)                                                   |             |
|                         |                                            | b) Malignant‡                       | 4                        |          | 3                                       |           | 1 (copper)                                                    |             |
|                         |                                            |                                     |                          |          |                                         |           | 3 (hormone)                                                   |             |
|                         | Gall Bladder Disease                       | a) Symptomatic:                     |                          |          |                                         |           |                                                               |             |
|                         |                                            | i) Treated by cholecystectomy       | 2                        |          | 2                                       |           | 1 (copper)                                                    |             |
|                         |                                            |                                     |                          |          |                                         |           | 2 (hormone)                                                   |             |
|                         |                                            | ii) Medically treated               | 3                        |          | 2                                       |           | 1 (copper)                                                    |             |
|                         |                                            |                                     |                          |          |                                         |           | 2 (hormone)                                                   |             |
|                         |                                            | iii) Current                        | 3                        |          | 2                                       |           | 1 (copper)                                                    |             |
|                         |                                            |                                     |                          |          |                                         |           | 2 (hormone)                                                   |             |
|                         |                                            | b) Asymptomatic                     | 2                        |          | 2                                       |           | 1 (copper)                                                    |             |
|                         |                                            |                                     |                          |          |                                         |           | 2 (hormone)                                                   |             |
|                         | History of Cholestasis                     | a) Pregnancy-related                | 2                        |          | 1                                       |           | 1                                                             |             |
|                         |                                            | b) Past COC-related                 | 3                        |          | 2                                       |           | 1 (copper)                                                    |             |
|                         | Blood Disorders                            |                                     |                          |          |                                         |           | 2 (hormone)                                                   |             |
|                         |                                            | a) Thalassemia                      | 1                        |          | 1                                       |           | 2 (copper)                                                    |             |
|                         |                                            |                                     |                          |          |                                         |           | 1 (hormone)                                                   |             |
|                         |                                            | b) Sickle Cell Disease‡             | 2                        |          | 1                                       |           | 2 (copper)                                                    |             |
|                         |                                            |                                     |                          |          |                                         |           | 1 (hormone)                                                   |             |
|                         |                                            | c) Iron-deficiency anemia           | 1                        |          | 1                                       |           | 2 (copper)                                                    |             |
|                         |                                            |                                     |                          |          |                                         |           | 1 (hormone)                                                   |             |
|                         | Solid Organ Transplant‡                    | a) Complicated                      | 4                        |          | 2                                       |           | 3 (IUD)                                                       | 2 (IUD)     |
|                         |                                            |                                     |                          |          |                                         |           | 2 (implant)                                                   |             |
|                         |                                            | b) Uncomplicated                    | 2*                       |          | 2                                       |           | 2                                                             |             |
|                         | Multiple Sclerosis                         | a) Patient is mobile                | 1                        |          | 1 (POP)                                 |           | 1                                                             |             |
|                         |                                            |                                     |                          |          | 2 (shot)                                |           |                                                               |             |
|                         |                                            | b) Patient has prolonged immobility | 3                        |          | 1 (POP)                                 |           | 1                                                             |             |
|                         |                                            |                                     |                          |          | 2 (shot)                                |           |                                                               |             |
|                         | Cystic Fibrosis‡                           |                                     |                          |          | 1* (POP)                                |           | 1*                                                            |             |
|                         |                                            |                                     | 1*                       |          | 2* (shot)                               |           |                                                               |             |
| 16<br>(conditions)      | Seizures/Epilepsy ‡                        | (see also Drug Interactions)        | 1*                       |          | 1*                                      |           | 1 (IUD)                                                       |             |
|                         | Tuberculosis‡ (see also drug interactions) |                                     |                          |          |                                         |           | 1* (implant)                                                  |             |
|                         |                                            | a) Non-pelvic                       | 1*                       |          | 1*                                      |           | 1 (IUD)                                                       |             |
|                         |                                            |                                     |                          |          |                                         |           | 1* (implant)                                                  |             |
|                         |                                            | b) Pelvic                           | 1*                       |          | 1*                                      |           | 4 (IUD)                                                       | 3 (IUD)     |
|                         |                                            |                                     |                          |          |                                         |           | 1* (implant)                                                  |             |
|                         | HIV                                        | High risk                           |                          |          | 1 (POP)                                 |           | 2 (IUD)                                                       |             |
|                         |                                            |                                     | 1                        |          | 2* (shot)                               |           | 1 (implant)                                                   |             |

| Self-Screening Question     | Condition              | Sub-Condition                                                                                             | Combined Pill/Patch/Ring                              |                   | Progestin-Only Methods: Pill (POP)/Shot |          | Long-Acting Methods: Copper (IUD) / Hormone (IUD and Implant) |          |
|-----------------------------|------------------------|-----------------------------------------------------------------------------------------------------------|-------------------------------------------------------|-------------------|-----------------------------------------|----------|---------------------------------------------------------------|----------|
|                             |                        |                                                                                                           | Initiate                                              | Continue          | Initiate                                | Continue | Initiate                                                      | Continue |
|                             |                        | HIV infected (See Also Drug Interactions)                                                                 |                                                       |                   |                                         |          |                                                               |          |
|                             |                        | i) Clinically well on therapy                                                                             | 1*                                                    | 1*                | 1 (IUD)                                 |          |                                                               |          |
|                             |                        |                                                                                                           |                                                       |                   | 1* (implant)                            |          |                                                               |          |
|                             |                        |                                                                                                           | ii) Not Clinically well or not receiving ARV therapy‡ | 1*                | 1*                                      | 2 (IUD)  | 1 (IUD)                                                       |          |
| 1* (implant)                |                        |                                                                                                           |                                                       |                   |                                         |          |                                                               |          |
| 16 & 17 (Drug Interactions) | Antiretroviral therapy | Fosamprenavir (FPV) (All other ARV's are 1 or 2 for all methods)                                          | 3*                                                    | 2*                | 1/2* (IUD)                              | 1* (IUD) |                                                               |          |
|                             |                        |                                                                                                           |                                                       |                   | 2* (implant)                            |          |                                                               |          |
| 16 & 17 (Drug Interactions) | Anticonvulsant Therapy | a) Certain anticonvulsants (phenytoin, carbamazepine, barbiturates, primidone, topiramate, oxcarbazepine) | 3*                                                    | 3* (POP)          | 1 (IUD)                                 |          |                                                               |          |
|                             |                        |                                                                                                           |                                                       | 1* (shot)         | 2* (implant)                            |          |                                                               |          |
|                             |                        | b) Lamotrigine                                                                                            | 3*                                                    | 1                 | 1                                       |          |                                                               |          |
|                             | Antimicrobial Therapy  | a) Broad spectrum antibiotics                                                                             | 1                                                     | 1                 | 1                                       |          |                                                               |          |
|                             |                        | b) Antifungals                                                                                            | 1                                                     | 1                 | 1                                       |          |                                                               |          |
|                             |                        | c) Antiparasitics                                                                                         | 1                                                     | 1                 | 1                                       |          |                                                               |          |
|                             |                        | d) Rifampin or rifabutin therapy                                                                          | 3*                                                    | 3* (POP)          | 1 (IUD)                                 |          |                                                               |          |
|                             | 1*(shot)               |                                                                                                           |                                                       | 2* (implant)      |                                         |          |                                                               |          |
|                             | Supplements            | St. John's Wort                                                                                           | 2                                                     | 2 (POP)           | 1 (IUD)                                 |          |                                                               |          |
|                             |                        |                                                                                                           |                                                       | 1 (shot)          | 2 (implant)                             |          |                                                               |          |
| SSRI's                      |                        | 1                                                                                                         | 1                                                     | 1                 |                                         |          |                                                               |          |
|                             |                        |                                                                                                           |                                                       |                   |                                         |          |                                                               |          |
| 19                          | Weight >200lbs         |                                                                                                           | 2 (*patch efficacy)                                   | 1                 | 1                                       |          |                                                               |          |
|                             |                        |                                                                                                           |                                                       | 2 (shot, < 18yrs) |                                         |          |                                                               |          |
| 20                          | Smoking                | a) Age < 35                                                                                               | 2                                                     | 1                 | 1                                       |          |                                                               |          |
|                             |                        | b) Age ≥ 35, < 15 cigarettes/day                                                                          | 3                                                     | 1                 | 1                                       |          |                                                               |          |
|                             |                        | c) Age ≥ 35, >15 cigarettes/day                                                                           | 4                                                     | 1                 | 1                                       |          |                                                               |          |

**Abbreviations:** POP: Progestin-Only Pill, IUD: Intra-uterine Device

**Key:** \*Please see complete guidance for a clarification to this classification: <https://www.cdc.gov/mmwr/volumes/65/rr/pdfs/rr6503.pdf>

‡ Condition that exposes a woman to increased risk as a result of pregnancy

**Venous Thrombus Embolism (VTE) Risk Factors:** age ≥35 years, previous VTE, thrombophilia, immobility, transfusion at delivery, peripartum cardiomyopathy, BMI ≥30 kg/m<sup>2</sup>, postpartum hemorrhage, post cesarean delivery, preeclampsia, or smoking
